1 **TITLE**

2 **Solicited Cough Sound Analysis for Tuberculosis Triage Testing: The CODA TB**  
3 **DREAM Challenge Dataset**

4  
5 **RUNNING TITLE**

6 Cough sounds for tuberculosis triage

7  
8 **AUTHORS**

9 Sophie Huddart<sup>1\*</sup>, Vijay Yadav<sup>2\*</sup>, Solveig K. Sieberts<sup>2</sup>, Larson Omberg<sup>2,3</sup>, Mihaja  
10 Raberahona<sup>4,5</sup>, Rivo Rakotoarivelo<sup>6,7</sup>, Issa N. Lyimo<sup>8</sup>, Omar Lweno<sup>8</sup>, Devasahayam J  
11 Christopher<sup>9</sup>, Nguyen Viet Nhung<sup>10</sup>, Grant Theron<sup>11</sup>, William Worodria<sup>12</sup>, Charles Y.  
12 Yu<sup>13</sup>, Christine M Bachman<sup>14</sup>, Stephen Burkot<sup>14</sup>, Puneet Dewan<sup>14</sup>, Sourabh Kulhare<sup>14</sup>,  
13 Peter M Small<sup>14</sup>, Adithya Cattamanchi<sup>15</sup>, Devan Jaganath<sup>15#</sup>, Simon Grandjean  
14 Lapierre<sup>16,17#</sup>

15 \*, #Equal contributions

16  
17 **AFFILIATIONS**

18 <sup>1</sup>University of California San Francisco, School of Medicine, 533 Parnassus Ave, San  
19 Francisco, CA 94143 USA

20 <sup>2</sup>Sage Bionetworks, Seattle, WA 98103 USA

21 <sup>3</sup>Curently at Koneksa Health, One World Trade Center 285 Fulton St. 77th Floor New  
22 York, NY, 10007

23 <sup>4</sup>CHU Joseph Rasera Befelatanana, Antananarivo, 101, Analamanga, Madagascar

24 <sup>5</sup>Centre d'Infectiologie Charles Mérieux, Antananarivo, 101, Analamanga, Madagascar

25 <sup>6</sup>CHU Tambohobe Fianarantsoa, 301, Haute-Matsiatra, Madagascar

26 <sup>7</sup>Université de Fianarantsoa, Fianarantsoa, 301, Haute-Matsiatra, Madagascar

27 <sup>8</sup>Ifakara Health Institute, Environmental and Ecological Sciences & Interventions and  
28 Clinical Trials Departments, Kiko Avenue, Plot 463, Mikocheni, Dar es Salaam,  
29 Tanzania

30 <sup>9</sup>Christian Medical College, Ida Scudder Road, Vellore 632004, Tamil Nadu, India

31 <sup>10</sup>National Tuberculosis Programme, 463 Hoang Hoa Tham, Ba Dinh District, Hanoi,  
32 Vietnam

33 <sup>11</sup>Stellenbosch University, Division of Molecular Biology and Human Genetics,  
34 Matieland, 7602 South Africa

35 <sup>12</sup>Walimu, Plot 5-7, Coral Crescent, Kololo, Kampala, Uganda

36 <sup>13</sup>De La Salle Medical and Health Sciences Institute, Governor D. Mangubat Avenue,  
37 Dasmariñas Cavite, Philippines 4114

38 <sup>14</sup>Global Health Labs, 14360 SE Eastgate Way, Bellevue, WA 98007 USA

39 <sup>15</sup>University of California Irvine, School of Medicine, 333 City Blvd. W Suite 400, Orange  
40 CA 92868 USA

41 <sup>16</sup>Centre de Recherche du Centre Hospitalier de l'Université de Montréal,  
42 Immunopathology Axis, 900 St-Denis, Montréal, Québec, H2X 0A9 Canada

43 <sup>17</sup>Université de Montréal, Department of Microbiology, Infectious Diseases and  
44 Immunology, 2900 Edouard-Montpetit, Montréal, Québec, H3T 1J4 Canada

45

46 **CORRESPONDING AUTHOR**

47 Simon Grandjean Lapierre

48 [Simon.grandjean.lapierre@umontreal.ca](mailto:Simon.grandjean.lapierre@umontreal.ca)

49

50 **WORD COUNT**

51 2286

52 **ABSTRACT**

53 Cough is a common and commonly ignored symptom of lung disease. Cough is often  
54 perceived as difficult to quantify, frequently self-limiting, and non-specific. However,  
55 cough has a central role in the clinical detection of many lung diseases including  
56 tuberculosis (TB), which remains the leading infectious disease killer worldwide. TB  
57 screening currently relies on self-reported cough which fails to meet the World Health  
58 Organization (WHO) accuracy targets for a TB triage test. Artificial intelligence (AI)  
59 models based on cough sound have been developed for several respiratory conditions,  
60 with limited work being done in TB. To support the development of an accurate, point-  
61 of-care cough-based triage tool for TB, we have compiled a large multi-country  
62 database of cough sounds from individuals being evaluated for TB. The dataset  
63 includes more than 700,000 cough sounds from 2,143 individuals with detailed  
64 demographic, clinical and microbiologic diagnostic information. We aim to empower  
65 researchers in the development of cough sound analysis models to improve TB  
66 diagnosis, where innovative approaches are critically needed to end this long-standing  
67 pandemic.

## 68 BACKGROUND AND SUMMARY

69 Tuberculosis remains the leading infectious disease killer globally, partly due to public  
70 health systems' inability to accurately diagnose millions of infected individuals every  
71 year.<sup>1</sup> Insufficient access to high-quality TB screening and diagnosis is recognized as  
72 one of the most important gaps in the cascade of care.<sup>2</sup> Here we describe a cough  
73 sound database including detailed demographic, clinical and microbiologic information  
74 for the development of AI-based sound classification TB triage models. As the WHO's  
75 End TB Strategy calls for intensified research and innovation including the discovery of  
76 new tools for community-based screening, digital cough monitoring and *Acoustic*  
77 *Epidemiology* could represent new tools that can help bend the TB pandemic curve and  
78 accelerate the achievement of global TB elimination goals.<sup>3-5</sup>

79  
80 The "missing millions" of undiagnosed patients living with active TB disease represent  
81 an heterogeneous group including those who did not access triage or diagnosis testing  
82 or weren't appropriately referred for effective treatment. Improving the accuracy,  
83 portability, point-of-care amenability and connectivity of diagnostic tools and algorithms  
84 would have significant value. Most health systems build their TB programs on a  
85 combination of complementary screening followed by diagnostic tests. The WHO's  
86 target product profile (TPP) for a community-based TB triage test suggests that it should  
87 be at least 90% sensitive and 70% specific.<sup>6</sup> According to the 2021 WHO TB screening  
88 guidelines, symptom-based screening with questionnaires, including cough, is 42%  
89 sensitive.<sup>7</sup> Besides having poor accuracy these guidelines have operational challenges  
90 that impede its sustained and uniform implementation within resource-challenged TB  
91 programs. Other tools such as digital chest X-rays combined with computer-aided  
92 detection (CAD) algorithms have also been evaluated in the context of TB triage. This  
93 approach was shown to be highly sensitive but had variable specificity and remains  
94 difficult to deploy due to limited availability of chest X-ray platforms at primary-level  
95 health facilities.<sup>8</sup> Whether in the context of community-based outreach screening or  
96 healthcare facility-based evaluation prior to confirmatory testing, cough classification  
97 models could complement or replace other triage strategies including symptom-based  
98 screening.

99

100 We historically have been unable to objectively monitor cough sounds and consequently  
101 reduced this data-rich symptom into subjective and dichotomous information (e.g.,  
102 cough versus no cough, chronic versus acute, better versus worse). Advances in  
103 acoustics and machine learning (ML) have enabled the identification and recording of  
104 human coughs in real-world acoustic environments (cough detection) as well as  
105 differentiation of coughs from patients with distinct clinical conditions or at different  
106 stages of disease (cough classification). As part of the emerging field of *Acoustic*  
107 *Epidemiology*, this has the potential to develop novel screening or diagnostic assays  
108 with simple digital recording devices, such as a smartphone, tablet or watch.<sup>5</sup> Proof-of-  
109 concept studies previously showed that cough associated with TB contains a specific  
110 acoustic signature which can be recognized by ML models. A study by *Pahar et al.*  
111 suggests that a cough-based TB screening model can discriminate TB cough sounds  
112 from those associated with other lung conditions with 93% sensitivity and 95%  
113 specificity, exceeding the WHO TPPs.<sup>9</sup> In a study combining cough sound analysis and  
114 patients' clinical characteristics, *Yellapu et al.* report that ML can be used to detect TB  
115 with 90% sensitivity and 85% specificity.<sup>10</sup> Those pilot studies report on ML models  
116 which were designed on small datasets and were not validated in external populations.  
117 Given the potential impact on performance of local disease epidemiology and  
118 population ethnicity among other confounders, large and diverse cough datasets are  
119 needed to replicate those studies.

120  
121 We collected and are here releasing a dataset including 733,756 cough sounds from  
122 2,143 patients across 7 countries with accurately annotated demographic, clinical and  
123 microbiologic diagnostic information. These data were initially used to enable and  
124 evaluate the CODA TB DREAM Challenge which invited participants to develop  
125 algorithms for prediction of TB diagnosis. The training data are now available for  
126 general use, and researchers are invited to leverage acoustic and clinical data to further  
127 develop and evaluate sound classification models for TB screening against a held-out  
128 test partition.<sup>11</sup> We aim to enable the development of models which could achieve the  
129 WHO TPP performance targets for the current 'community-based TB triage test' or the  
130 forthcoming TPP for a TB screening test.<sup>6,12</sup> This data set has limitations which include  
131 some selection bias since it was collected from a symptomatic presumptive TB

132 population. The developed models which will be developed may hence not perform as  
133 well if used for asymptomatic screening at population level. Accordingly, more data  
134 should be collected from community screening activities.

135

## 136 **METHODS**

### 137 **Participants**

138 A total of 2,143 participants were recruited from two parent studies described below. To  
139 be eligible, participants had to be 18 years or older and have a new or worsening cough  
140 for at least two weeks. took place at outpatient clinics in India, Madagascar, the  
141 Philippines, South Africa, Tanzania, Uganda, and Vietnam. All participants provided  
142 informed consent. A summary of participant demographics and country distribution are  
143 available in Table 1.

144

145 *Rapid Research in Diagnostic Development TB Network (R2D2 TB Network) study:*

146 The R2D2 TB Network study evaluates novel TB diagnostics in various stages of  
147 development among people with presumptive TB in five low- and middle-income  
148 countries: Uganda, South Africa, Vietnam, the Philippines and India.<sup>13</sup> Ethical approval  
149 for this study was obtained from institutional review boards (IRB) in the US and in each  
150 study site. In the US, approval was obtained from the University of California San  
151 Francisco IRB (# 20-32670). In Vietnam, approval was obtained from the Ministry of  
152 Health Ethical Committee for National Biological Medical Research (94/CN-HĐĐĐ), the  
153 National Lung Hospital Ethical Committee for Biological Medical Research  
154 (566/2020/NCKH) and the Hanoi Department of Health, Hanoi Lung Hospital Science  
155 and Technology Initiative Committee (22/BVPHN). In India, approval was obtained from  
156 Christian Medical College IRB (13256). In South Africa, approval was obtained from  
157 Stellenbosch University Health Research Ethics Committee (17047). In Uganda,  
158 approval was obtained from Makerere University, College of Health Sciences, School of  
159 Medicine, Research Ethics Committee (2020-182). In the Philippines, approval was  
160 obtained from De La Salle Health Sciences Institute Independent Ethics Committee  
161 (2020-33-02-A).

162

163 *The Digital Cough Monitoring for screening, diagnosis and clinical follow-up of*  
164 *tuberculosis and other respiratory diseases project:* This project was designed to embed  
165 digital cough monitoring within existing health facility-based TB diagnostic cohorts in  
166 Madagascar and Tanzania. Ethical approval for this study was obtained from  
167 institutional review boards (IRB) in Canada and in each study site. In Canada, approval  
168 was obtained from the Centre de Recherche du Centre Hospitalier de l'Université de  
169 Montréal IRB (# 2021-9270, 20.226). In Madagascar, approval was obtained from the  
170 Comité d'Éthique à la Recherche Biomédicale (IORG0000851 - N°051-  
171 MSANP/SG/AMM/CERBM).). In Tanzania, approval was obtained from the Ifakarah  
172 Health Institute IRB (31-2021) and the National Institute for Medical Research  
173 (NIMR/HQ/R.8a/Vol IX/3805).

174

## 175 **Data Collection**

176 *Demographic and clinical data.* At enrollment into the parent studies, participants  
177 underwent a baseline questionnaire, clinical examination, and sputum collection for TB  
178 testing. Study staff also recorded participants' age, gender, height, weight, smoking  
179 status and duration of cough. HIV diagnosis was made either based on participant self-  
180 report of a positive HIV diagnosis or a positive test result. A summary of the available  
181 variables is shown in Table 2.

182

183 *TB Reference Standard Testing.* Both Xpert MTB/RIF Ultra PCR and mycobacterial  
184 culture (Lowenstein-Jensen solid medium or MGIT liquid medium) were performed on  
185 sputum collected from all participants. Any participant whose first sputum Xpert  
186 MTB/RIF Ultra result was indeterminate or trace-positive, received a second sputum  
187 Xpert MTB/RIF Ultra test. Results from those assays were combined to determine TB  
188 status according to two reference standards: a microbiologic reference standard and a  
189 sputum Xpert reference standard. The sputum Xpert reference standard is restricted to  
190 Xpert MTB/RIF Ultra results on sputum samples. The microbiologic reference standard  
191 includes culture results, allowing for more individuals to be classified as TB positive.  
192 The microbiologic reference standard is considered the primary reference standard. Full  
193 details of the reference standards are described in Table 3.

194

195 *Cough Recording.* Cough sounds were collected using smartphones loaded with the  
196 Hyfe research app.<sup>14</sup> Specific phone models used in the different participating sites are  
197 presented in Supplementary Materials 1. Hyfe research app is designed to listen for  
198 explosive sounds and record ~0.5 seconds sound fragments corresponding to putative  
199 cough sounds. Hyfe research app uses a server-based convolutional neural network  
200 (CNN) model to classify explosive sounds as coughs and recordings of these cough  
201 sounds are saved on a protected health information (PHI)-regulated server for analysis.  
202 This model has been shown to be 96% sensitive and 96% specific for cough detection  
203 using human-labeled sounds as a reference standard.<sup>15</sup> Smartphones were positioned  
204 on tripods in rooms within the clinic. Participants were asked to cough five times  
205 (solicited cough) while standing 60-90 cm from the tripod; participants who managed to  
206 produce at least three coughs were retained in the dataset. Some participants produced  
207 more than five coughs due to a triggered coughing fit and those additional coughs were  
208 also collected and included in the dataset. Solicited and triggered coughs could not be  
209 labeled distinctively and are treated the same in the dataset. After enrollment and  
210 onboarding, a subset of participants (n = 565) were also asked to carry a study phone  
211 for two weeks and collect longitudinal coughs sounds in an outpatient setting. Those  
212 sounds are labeled as longitudinal and made available within the dataset. A tally of  
213 solicited and longitudinal cough sounds per data partition are available in Table 4.

214

### 215 **Data Partitioning**

216 The dataset was split into a training (n=1,105) and validation set (n=1,038). The dataset  
217 was randomly partitioned evenly between the training and testing set at the level of the  
218 participant (i.e., all of a participant's cough sounds are in either the training or validation  
219 set).

220

### 221 **Data Pre-Processing**

222 *Cough sounds:* The sound recordings available in this dataset have not undergone pre-  
223 processing beyond their identification as a cough sound by the Hyfe research app CNN  
224 model.

225



226 *Clinical Data:* Data from all participating sites were collected with standardized  
227 questionnaires and definitions. Data formatting was harmonized in the open access  
228 database.

229

### 230 **Dataset Description**

231 Sage Bionetworks independently verified the variable balance between the training and  
232 validation sets as demonstrated in Table 1. A breakdown of key demographics and  
233 microbiologic reference standard results by country are shown in Table 5.

## 234 **DATA RECORDS**

235 De-identified participant demographic and clinical data, including TB reference standard  
236 results, cough sound WAV files, and a datafile linking participant IDs to sound file IDs  
237 were exported to a dedicated project in Synapse. Synapse is a general-purpose data  
238 and analysis sharing service where members can work collaboratively, analyze data,  
239 share insights, and have attributions and provenance of those insights to share with  
240 others. Synapse is developed and operated by Sage Bionetworks<sup>16</sup>. A total of 1,105  
241 participants' data are made available for access and download as a training dataset.  
242 The validation set is withheld, but models can be evaluated against the validation set via  
243 the instructions provided in the Synapse project.

244  
245 All training set files are stored and are accessible via the Synapse platform with  
246 associated metadata and documentation and can be accessed at the following URL:  
247 [www.synapse.org/TBcough](http://www.synapse.org/TBcough) - <https://doi.org/10.7303/syn31472953>.

## 248 249 **TECHNICAL VALIDATION**

250 All cough collection periods were observed by study staff and cough sounds were spot-  
251 checked for accurate recording. Patient metadata was reviewed by study staff for  
252 accuracy. The data described in this article were collected using the Hyfe Research app  
253 which uses a proprietary algorithm to identify cough sounds. We used a prediction score  
254 of 0.8 from this algorithm to filter potential non-cough sounds. To validate the precision  
255 of the Hyfe algorithm, a standalone computer vision and deep learning model was  
256 trained using Log Mel spectrogram images from ESC-50 and Coswara datasets.<sup>17,18</sup>  
257 The "VGG16" CNN based pre-trained model was trained for accurate classification of  
258 cough sounds and achieved a model accuracy of approximately 96% on Hyfe cough  
259 recordings.<sup>19</sup> Most of the recordings that were classified incorrectly had a Hyfe  
260 prediction score less than 0.8.

261

## 262 **USAGE NOTES**

263 Users can register to evaluate predictive models of TB diagnosis against the held-out  
264 test partition via the instructions on the Synapse project. The scoring mechanism can  
265 evaluate two different types of models: (1) those that use only cough sounds, or (2)  
266 those which also incorporate clinical metadata variables which have been provided in  
267 the training dataset (sex, age, height, weight, reported duration of cough, prior TB  
268 diagnosis and type, hemoptysis, heart rate, temperature, weight loss, smoking in the  
269 last week, fever and night sweats). Models are submitted to the scoring queues as  
270 Docker images. Full instructions and example code is available on Synapse project  
271 website ([www.synapse.org/TBcough](http://www.synapse.org/TBcough)).

272

### 273 **Downloading the Data**

274 Given the number of files represented in the data, users should consider downloading  
275 the data via one of the programmatic Synapse clients (available in R or Python). For  
276 convenience, Python code for downloading the data is provided in the Synapse project  
277 wiki. The training dataset size is (0.43 GB) for the solicited coughs and (31.6 GB) for the  
278 longitudinal coughs.

279

### 280 **Data Use Agreement**

281 To access the data, individuals must become Certified and Validated users of Synapse  
282 and maintain an active account on Synapse: <http://www.synapse.org>. They must also  
283 submit an Intended Data Use Statement and agree to the Terms of Use of the dataset.  
284 Terms of Use are summarized in Supplementary Materials 2.

285

### 286 **CODE AVAILABILITY**

287 No additional data processing was conducted other than what has been described  
288 above.

289

### 290 **DATA AVAILABILITY**

291 All training set files are stored and are accessible via the Synapse platform with  
292 associated metadata and documentation and can be accessed at the following URL:  
293 [www.synapse.org/TBcough](http://www.synapse.org/TBcough).

294

295 Specific acoustic and clinical metadata as well as dataset information can be found  
296 under the following doi references.

297 Clinical data: <https://doi.org/10.7303/syn53710097>

298 Cough metadata: <https://doi.org/10.7303/syn53710098>

299 Solicited Coughs: <https://doi.org/10.7303/syn40358494>

300 Longitudinal Coughs: <https://doi.org/10.7303/syn40358476>

301 Data Dictionary: <https://doi.org/10.7303/syn41743692>

302 Data sharing and model benchmarking website: <https://doi.org/10.7303/syn31472953>

## 303 REFERENCES

- 304 1 WHO. Global TB report 2023. (2023).
- 305 2 Faust, L. *et al.* Improving measurement of tuberculosis care cascades to  
306 enhance people-centred care. *Lancet Infect Dis* **23**, e547-e557,  
307 doi:10.1016/S1473-3099(23)00375-4 (2023).
- 308 3 Houben, R. *et al.* Feasibility of achieving the 2025 WHO global tuberculosis  
309 targets in South Africa, China, and India: a combined analysis of 11  
310 mathematical models. *Lancet Glob Health* **4**, e806-e815, doi:10.1016/S2214-  
311 109X(16)30199-1 (2016).
- 312 4 WHO. The end TB strategy. (2015).
- 313 5 Zimmer, A. J. *et al.* Making cough count in tuberculosis care. *Commun Med*  
314 (*Lond*) **2**, 83, doi:10.1038/s43856-022-00149-w (2022).
- 315 6 WHO. High-priority target product profiles for new tuberculosis diagnostics: report  
316 of a consensus meeting. (2014).
- 317 7 WHO. WHO operational handbook on tuberculosis. Module 2: screening -  
318 systematic screening for tuberculosis disease. (2021).
- 319 8 Tavaziva, G. *et al.* Chest X-ray Analysis With Deep Learning-Based Software as  
320 a Triage Test for Pulmonary Tuberculosis: An Individual Patient Data Meta-  
321 Analysis of Diagnostic Accuracy. *Clin Infect Dis* **74**, 1390-1400,  
322 doi:10.1093/cid/ciab639 (2022).
- 323 9 Pahar, M. *et al.* Automatic cough classification for tuberculosis screening in a  
324 real-world environment. *Physiol Meas* **42**, doi:10.1088/1361-6579/ac2fb8 (2021).
- 325 10 Yellapu, G. D. *et al.* Development and clinical validation of Swaasa AI platform  
326 for screening and prioritization of pulmonary TB. *Sci Rep* **13**, 4740,  
327 doi:10.1038/s41598-023-31772-9 (2023).
- 328 11 Bionetworks, S. CODA TB DREAM Challenge, <[www.synapse.org/TBcough](http://www.synapse.org/TBcough)>  
329 (2024).
- 330 12 WHO. *Public consultation for Target Product Profiles for TB screening tests*,  
331 <[https://www.who.int/news-room/articles-detail/public-consultation-for-target-](https://www.who.int/news-room/articles-detail/public-consultation-for-target-product-profiles-for-tb-screening-tests)  
332 <[product-profiles-for-tb-screening-tests](https://www.who.int/news-room/articles-detail/public-consultation-for-target-product-profiles-for-tb-screening-tests)> (2024).
- 333 13 R2D2. *Rapid Research in Diagnostics Development for TB Network*,  
334 <<https://www.r2d2tbnetwork.org/>> (2024).
- 335 14 HyfeAI. *Hyfe AI*, <<https://www.hyfe.ai/>> (2024).
- 336 15 Gabaldon-Figueira, J. C. *et al.* Digital acoustic surveillance for early detection of  
337 respiratory disease outbreaks in Spain: a protocol for an observational study.  
338 *BMJ Open* **11**, e051278, doi:10.1136/bmjopen-2021-051278 (2021).
- 339 16 Omberg, L. *et al.* Enabling transparent and collaborative computational analysis  
340 of 12 tumor types within The Cancer Genome Atlas. *Nat Genet* **45**, 1121-1126,  
341 doi:10.1038/ng.2761 (2013).
- 342 17 Piczak, K. Dataset for Environmental Sound Classification. *Proceedings of the*  
343 *23rd ACM international conference on Multimedia*,  
344 doi:doi.org/10.1145/2733373.2806390 (2015).
- 345 18 Bhattacharya, D. *et al.* Coswara: A respiratory sounds and symptoms dataset for  
346 remote screening of SARS-CoV-2 infection. *Sci Data* **10**, 397,  
347 doi:10.1038/s41597-023-02266-0 (2023).

348 19 Simonyan K., Z. A. Very deep convolutional networks for large-scale image  
349 recognition. *conference paper* @CLR2015,  
350 doi:<https://doi.org/10.48550/arXiv.1409.1556> (2015).  
351

352 **TABLES**

353 **Table 1 – Participant demographics across training and test sets**

|                                 | <b>Training set<br/>(N=1105)</b> | <b>Testing set<br/>(N=1038)</b> | <b>Complete<br/>set<br/>(N=2143)</b> |
|---------------------------------|----------------------------------|---------------------------------|--------------------------------------|
| <b>Sex</b>                      |                                  |                                 |                                      |
| Female                          | 517 (46.8%)                      | 460 (44.3%)                     | 977 (45.6%)                          |
| Male                            | 588 (53.2%)                      | 578 (55.7%)                     | 1166 (54.4%)                         |
| <b>Age</b>                      |                                  |                                 |                                      |
| Median [Q1, Q3]                 | 40.0 [28, 53]                    | 40.0 [29, 53]                   | 40.0 [28, 53]                        |
| <b>Height (cm)</b>              |                                  |                                 |                                      |
| Median [Q1, Q3]                 | 162 [155, 168]                   | 162 [156, 168]                  | 162 [156, 168]                       |
| <b>Weight (Kg)</b>              |                                  |                                 |                                      |
| Median [Q1, Q3]                 | 55.0 [49, 65]                    | 56.0 [49, 65]                   | 55.8 [49, 65]                        |
| <b>HIV status</b>               |                                  |                                 |                                      |
| Negative                        | 878 (79.5%)                      | 809 (77.9%)                     | 1687 (78.7%)                         |
| Positive                        | 162 (14.7%)                      | 155 (14.9%)                     | 317 (14.8%)                          |
| Unknown                         | 65 (5.9%)                        | 74 (7.1%)                       | 139 (6.5%)                           |
| <b>Duration of cough (days)</b> |                                  |                                 |                                      |
| Median [Q1, Q3]                 | 30.0 [16, 60]                    | 30.0 [16, 50]                   | 30.0 [16, 60]                        |
| <b>Prior TB</b>                 |                                  |                                 |                                      |
| No                              | 903 (81.7%)                      | 835 (80.4%)                     | 1738 (81.1%)                         |
| Not sure                        | 3 (0.3%)                         | 2 (0.2%)                        | 5 (0.2%)                             |
| Yes                             | 199 (18.0%)                      | 201 (19.4%)                     | 400 (18.7%)                          |
| <b>Country</b>                  |                                  |                                 |                                      |
| India                           | 119 (10.8%)                      | 122 (11.8%)                     | 241 (11.2%)                          |
| Madagascar                      | 159 (14.4%)                      | 75 (7.2%)                       | 234 (10.9%)                          |
| The Philippines                 | 198 (17.9%)                      | 190 (18.3%)                     | 388 (18.1%)                          |
| South Africa                    | 137 (12.4%)                      | 138 (13.3%)                     | 275 (12.8%)                          |
| Tanzania                        | 87 (7.9%)                        | 110 (10.6%)                     | 197 (9.2%)                           |
| Uganda                          | 242 (21.9%)                      | 245 (23.6%)                     | 487 (22.7%)                          |



|                                         | <b>Training set<br/>(N=1105)</b> | <b>Testing set<br/>(N=1038)</b> | <b>Complete<br/>set<br/>(N=2143)</b> |
|-----------------------------------------|----------------------------------|---------------------------------|--------------------------------------|
| Vietnam                                 | 163 (14.8%)                      | 158 (15.2%)                     | 321 (15.0%)                          |
| <b>Microbiologic reference standard</b> |                                  |                                 |                                      |
| TB Negative                             | 807 (73.0%)                      | 782 (75.3%)                     | 1589 (74.1%)                         |
| TB Positive                             | 297 (26.9%)                      | 256 (24.7%)                     | 553 (25.8%)                          |
| <b>Sputum Xpert reference standard</b>  |                                  |                                 |                                      |
| Indeterminate                           | 4 (0.4%)                         | 2 (0.2%)                        | 6 (0.3%)                             |
| TB Negative                             | 839 (75.9%)                      | 808 (77.8%)                     | 1647 (76.9%)                         |
| TB Positive                             | 262 (23.7%)                      | 226 (21.8%)                     | 488 (22.8%)                          |

355 **Table 2 - Available demographic, clinical and microbiologic variables**

| Variable                      | Values                                                                              | Format/Definition                                                                                                                                                                                                                 |
|-------------------------------|-------------------------------------------------------------------------------------|-----------------------------------------------------------------------------------------------------------------------------------------------------------------------------------------------------------------------------------|
| Country                       | Philippines<br>Vietnam<br>South Africa<br>Uganda<br>India<br>Madagascar<br>Tanzania | Country where the participant was enrolled                                                                                                                                                                                        |
| Sex                           | Male<br>Female                                                                      | Sex at birth reported by participant                                                                                                                                                                                              |
| Age                           | Numeric                                                                             | Age calculated as date of collection - date of birth if known. If date of birth is unknown, reported age at time of collection.                                                                                                   |
| Height                        | Numeric                                                                             | Height in centimeters                                                                                                                                                                                                             |
| Weight                        | Numeric                                                                             | Weight in Kg                                                                                                                                                                                                                      |
| HIV status                    | Positive<br>Negative                                                                | HIV status. All participants who do not report being HIV-positive receive HIV testing (using capillary or venous blood)<br>Positive = Positive reported by patient or positive on a HIV test<br>Negative = Negative on a HIV test |
| Reported duration of cough    | Numeric                                                                             | Self-reported duration of current cough (days). At baseline, we ask: How many days have you had this new cough or cough that has been worse?                                                                                      |
| Prior TB                      | Yes<br>No                                                                           | Self-reported. At baseline, we ask: Have you ever had or been told you had tuberculosis (TB)?                                                                                                                                     |
| Prior TB type: Pulmonary      | Checked<br>Unchecked                                                                | Asked at baseline: "With what kind of TB were you diagnosed?" (may select more than one)<br>Participant selected pulmonary TB.                                                                                                    |
| Prior TB type: Extrapulmonary | Checked<br>Unchecked                                                                | Asked at baseline: "With what kind of TB were you diagnosed?" (may select more than one)<br>Participant selected extrapulmonary TB.                                                                                               |
| Prior TB type: Unknown        | Checked<br>Unchecked                                                                | Asked at baseline: "With what kind of TB were you diagnosed?" (may select more than one)<br>Participant selected Unknown.                                                                                                         |
| Hemoptysis                    | Yes<br>No                                                                           | In the past 30 days, have you ever coughed up blood?                                                                                                                                                                              |
| Heart rate                    | Numeric                                                                             | Participant's heartrate (beats per minute) measured at baseline                                                                                                                                                                   |
| Temperature                   | Numeric                                                                             | Participant's temperature (Celsius) measured at baseline.                                                                                                                                                                         |
| Weight loss                   | Yes<br>No                                                                           | Subjective, Self-reported. At baseline, we ask: In the past 30 days, have you experienced any weight loss?                                                                                                                        |

|                                   |                                             |                                                                                                                                                                      |
|-----------------------------------|---------------------------------------------|----------------------------------------------------------------------------------------------------------------------------------------------------------------------|
| Smoked in last week               | Yes<br>No                                   | Asked at baseline "Have you used combustible tobacco and/or vaping products in the last 7 days?"                                                                     |
| Fever                             | Yes<br>No                                   | Self-reported fever at baseline: "In the past 30 days, have you ever felt or experienced fever?"                                                                     |
| Night sweats                      | Yes<br>No                                   | Self-reported night sweats at baseline: "In the past 30 days, have you ever experienced night sweats?"                                                               |
| Microbiologic reference standard* | TB Positive<br>TB Negative<br>Indeterminate | TB diagnosis based on sputum and culture results                                                                                                                     |
| Sputum Xpert reference standard*  | Positive<br>Negative<br>Indeterminate       | TB diagnosis based on sputum results alone                                                                                                                           |
| Xpert combined semi-quant         | Trace<br>Very Low<br>Low<br>Medium<br>High  | Highest semiquantitative result from sputum Xpert Ultra test conducted at baseline visit. A semiquantitative result will only be available if the test was positive. |

357 **Table 3 – Reference standard definitions**

| <b>Result</b> | <b>Microbiologic Reference Standard</b>                                                                                                                                                                                                                                                                                                                                                                | <b>Sputum Xpert Reference Standard</b>                                                                                                                                   |
|---------------|--------------------------------------------------------------------------------------------------------------------------------------------------------------------------------------------------------------------------------------------------------------------------------------------------------------------------------------------------------------------------------------------------------|--------------------------------------------------------------------------------------------------------------------------------------------------------------------------|
| TB positive   | <p>One or more of the following:</p> <ul style="list-style-type: none"> <li>• a positive sputum Xpert result</li> <li>• a positive urine Xpert result</li> <li>• a positive liquid culture result</li> <li>• a positive solid culture result</li> <li>• a positive Xpert Ultra results on contaminated liquid culture</li> <li>• two trace positive Xpert Ultra results on any sample type.</li> </ul> | <p>One of the following:</p> <ul style="list-style-type: none"> <li>• a positive sputum Xpert result</li> <li>• two trace-positive sputum Xpert Ultra results</li> </ul> |
| TB negative   | <p>No positive results on any Xpert or Xpert Ultra testing and one of the following conditions:</p> <ul style="list-style-type: none"> <li>• two negative liquid cultures</li> <li>• two negative solid cultures</li> <li>• one negative liquid and one negative solid cultures</li> </ul>                                                                                                             | A negative sputum Xpert result                                                                                                                                           |
| Indeterminate | No positive results on any Xpert or Xpert Ultra testing and only one trace result on Xpert Ultra testing of any sample type                                                                                                                                                                                                                                                                            | An indeterminate or trace-positive sputum Xpert result followed by a non-positive result on repeat sputum Xpert Ultra testing                                            |

359 **Table 4 – Number of cough recordings per data partition**

|                                    | <b>Training set</b> | <b>Testing set</b> |
|------------------------------------|---------------------|--------------------|
| Solicited coughs (Participants)    | 9,772 (1,082)       | 9,062 (1,038)      |
| Longitudinal coughs (participants) | 714,922 (565)       | 0 (0)              |

360 *Longitudinal coughs are not used for evaluation on the testing set, so are not quantified*  
 361 *here.*

362

363 **Table 5 – Key variables summarized by country**

|                                         | <b>India</b><br>n = 241 | <b>Madagascar</b><br>n = 234 | <b>Philippines</b><br>n = 388 | <b>South Africa</b><br>n = 275 | <b>Tanzania</b><br>n = 197 | <b>Uganda</b><br>n = 487 | <b>Vietnam</b><br>n = 321 |
|-----------------------------------------|-------------------------|------------------------------|-------------------------------|--------------------------------|----------------------------|--------------------------|---------------------------|
| <b>Sex</b>                              |                         |                              |                               |                                |                            |                          |                           |
| Female                                  | 100 (41%)               | 115 (49%)                    | 208 (54%)                     | 144 (52%)                      | 86 (44%)                   | 203 (42%)                | 121 (38%)                 |
| Male                                    | 141 (59%)               | 119 (51%)                    | 180 (46%)                     | 131 (48%)                      | 111 (56%)                  | 284 (58%)                | 200 (62%)                 |
| <b>Age</b>                              |                         |                              |                               |                                |                            |                          |                           |
| Median [Q1, Q3]                         | 47 [34, 58]             | 32 [24, 51]                  | 39 [26, 53]                   | 40 [32, 49]                    | 40 [31, 50]                | 32 [26, 42]              | 54 [41, 64]               |
| <b>Duration of cough (days)</b>         |                         |                              |                               |                                |                            |                          |                           |
| Median [Q1, Q3]                         | 45 [30, 90]             | 30 [17, 60]                  | 21 [15, 30]                   | 21 [14, 28]                    | 30 [14, 30]                | 30 [16, 60]              | 30 [30, 90]               |
| <b>Prior TB</b>                         |                         |                              |                               |                                |                            |                          |                           |
| No                                      | 204 (85%)               | 207 (88%)                    | 325 (84%)                     | 170 (62%)                      | 147 (75%)                  | 427 (88%)                | 258 (80%)                 |
| Not sure                                | 0 (0%)                  | 0 (0%)                       | 4 (1.0%)                      | 0 (0%)                         | 0 (0%)                     | 0 (0%)                   | 1 (0.3%)                  |
| Yes                                     | 37 (15%)                | 27 (12%)                     | 59 (15%)                      | 105 (38%)                      | 50 (25%)                   | 60 (12%)                 | 62 (19%)                  |
| <b>Microbiologic reference standard</b> |                         |                              |                               |                                |                            |                          |                           |
| TB Negative                             | 216 (90%)               | 131 (56%)                    | 348 (90%)                     | 223 (81%)                      | 161 (82%)                  | 313 (64%)                | 199 (62%)                 |
| TB Positive                             | 25 (10%)                | 103 (44%)                    | 40 (10%)                      | 52 (19%)                       | 36 (18%)                   | 174 (36%)                | 122 (38%)                 |

364

365 **SUPPLEMENTARY MATERIALS**

366 **Supplementary materials 1 - Phone models used in the different participating**  
367 **sites**

368 India

369 - Redmi 9 Prime

370 - Realme Narzo20

371 Madagascar

372 - Motorola G9 play

373 Philippines

374 - Myphone myWX2 Pro

375 - Xiaomi 9C

376 South Africa

377 - Nokia 3.1

378 - Nokia 5.4

379 - Xiaomi Redmi 9A

380 Tanzania

381 - Nokia 3.4 Ta-1288

382 Uganda

383 - Motorola G16

384 - Samsung M11

385 - Nokia model 5.3

386 Vietnam

387 - OPPOA54

## 388 **Supplementary materials 2 – Data Use Agreement**

389

390 Researchers wishing to access the data must:

391

392 ☐ You must reaffirm your commitment to the Synapse Pledge and must abide by  
393 the guiding principles for responsible research use and data handling within the  
394 Synapse Commons Platform as described in the Synapse Governance  
395 documents.

396 ☐ You will not attempt to establish the identity of, or attempt to contact any of the  
397 subjects included in the data.

398 ☐ You confirm that if you inadvertently receive identifiable information or otherwise  
399 identify a subject, you will promptly notify the ACT by emailing  
400 [act@sagebase.org](mailto:act@sagebase.org).

401 ☐ You agree to establish appropriate administrative, technical, and physical  
402 safeguards to prevent unauthorized use of or access to the Data.

403 ☐ You will report any data misuse or breach of data security to ACT by emailing  
404 [act@sagebase.org](mailto:act@sagebase.org).

405 ☐ You will use the data only as identified in your intended data use statement  
406 (IDU), submitted through Synapse. The IDU should be written in English and  
407 must describe the objectives of the proposed research and study design and  
408 analysis plan (500 word maximum).

409 ☐ Data accessors must acknowledge the following in all publications or  
410 presentations as follows:

411 “The datasets used for the analyses described were contributed by Dr. Adithya  
412 Cattamanchi at UCSF and Dr. Simon Grandjean Lapierre at University of  
413 Montreal and were generated in collaboration with researchers at Stellenbosch  
414 University (PI Grant Theron), Walimu (PIs William Worodria and Alfred Andama);  
415 De La Salle Medical and Health Sciences Institute (PI Charles Yu), Vietnam  
416 National Tuberculosis Program (PI Nguyen Viet Nhung), Christian Medical  
417 College (PI DJ Christopher), Centre Infectiologie Charles Mérieux Madagascar  
418 (PIs Mihaja Raberahona & Rivonirina Rakotoarivelo), and Ifakara Health Institute  
419 (PIs Issa Lyimo & Omar Lweno) with funding from the U.S. National Institutes of

420 Health (U01 AI152087), The Patrick J. McGovern Foundation and Global Health  
421 Labs.”

422

## 423 **ACKNOWLEDGMENT**

424 We thank all patients and families who participated in this study. We thank healthcare  
425 providers, research personnel, laboratory technicians involved in patient recruitment  
426 and data collection.

427

428 - Funders / operations

429 Data from the CODA TB DREAM Challenge was generated with support from Global  
430 Health Labs, the Patrick J. McGovern Foundation, and the National Institute of Allergy  
431 and Infectious Diseases of the US National Institutes of Health under award number  
432 U01AI152087. The CODA TB DREAM Challenge and post-challenge evaluation was  
433 funded in part by the Bill & Melinda Gates Foundation.

434

435 - Direct salary support

436 SGL is supported by a Junior 1 Salary Award from the Fonds de Recherche Santé  
437 Québec. DJ is supported by funding by the National Institutes of Health

438

## 439 **AUTHOR CONTRIBUTION**

440 Conception (SKS, LO, CB, PD, PMS, AC, SGL), data acquisition (MR, RR, IL, OL, DJC,  
441 NVN, GT, WW, CY), data analysis (SH, VY, SKS, SK, DJ), data interpretation (N/A),  
442 drafting the work (SH, SGL), reviewing the work critically for important intellectual  
443 content and final approval of the version to be published (all co-authors).

444

445 Agreement to be accountable for all aspects of the work in ensuring that questions  
446 related to the accuracy or integrity of any part of the work are appropriately investigated  
447 and resolved (SH, SKS, AC, SGL).

448

## 449 **COMPETING INTERESTS**

450 The authors declare no competing interest.
